# Supplementary material for: Paternal age and the risk of low birth weight and preterm delivery: a Finnish register-based study
Source: PubMed Central journal article supplement — J Epidemiol Community Health. 2018 Aug 12;72(12):1104–9. doi: 10.1136/jech-2017-210170 (PMC6252372; doi:10.1136/jech-2017-210170), 2018-08-12
Supplement: jech-2017-210170supp001.pdf [file jech-2017-210170supp001.pdf]

## Appendix

We estimate a model of the type:

$$\text{CHILDOUTCOME}_{ij} = \alpha_j + \beta_1 \text{Paternal age}_{ij} + \beta_2 \text{SOCIODEM}_{ij} + e_{ij}$$

Where  $(i, j)$  indexes a child  $i$  born to father  $j$ .  $\alpha_j$  is the family fixed effect and  $B_1$  is a vector of the paternal age coefficients.  $B_2$  are child and parents socio-demographic characteristics. The model parameters are estimated by the conventional “within transformation” (Wooldridge 2012), such that the individual-specific constants  $\alpha_i$  are not actually estimated, and are therefore allowed to be freely correlated with any of the (observed or unobserved) time-invariant characteristics of the family that may affect both the selection into paternal age at birth and the child outcomes. This within-family estimate compares a child’s own probability of e.g. LBW based on his/her father age at birth to the average probability of his/her siblings born in the same family.

**Appendix Table 1: Change in probability of LBW (95% confidence intervals)**

|                                          | <b>Model 1:<br/>unadjusted<br/>(child's sex)</b> | <b>Model 2: Model 1<br/>+ child<br/>characteristics</b> | <b>Model 3: Model 1<br/>+ maternal<br/>characteristics</b> | <b>Model 4: Model 1<br/>+ hh<br/>sociodemographic<br/>variables</b> | <b>Model 5: fully<br/>adjusted</b> | <b>Model 6: Model 4<br/>+ sibling fixed<br/>effects</b> |
|------------------------------------------|--------------------------------------------------|---------------------------------------------------------|------------------------------------------------------------|---------------------------------------------------------------------|------------------------------------|---------------------------------------------------------|
| Girl                                     | 0.25<br>(0.07 - 0.42)                            | 0.25<br>(0.07 - 0.42)                                   | 0.24<br>(0.07 - 0.42)                                      | 0.25<br>(0.07 - 0.42)                                               | 0.24<br>(0.07 - 0.42)              | 0.23<br>(0.02 - 0.45)                                   |
| Maternal age 10-19<br>(reference: 25-29) |                                                  |                                                         | 0.47<br>(-0.35 - 1.28)                                     |                                                                     | -0.22<br>(-1.06 - 0.63)            | 0.55<br>(-0.48 - 1.58)                                  |
| Maternal age 20-24                       |                                                  |                                                         | 0.38<br>(0.09 - 0.68)                                      |                                                                     | 0.15<br>(-0.15 - 0.45)             | 0.29<br>(-0.15 - 0.73)                                  |
| Maternal age 30-34                       |                                                  |                                                         | 0.15<br>(-0.08 - 0.38)                                     |                                                                     | 0.34<br>(0.11 - 0.58)              | -0.06<br>(-0.45 - 0.33)                                 |
| Maternal age 35-39                       |                                                  |                                                         | 0.57<br>(0.18 - 0.96)                                      |                                                                     | 0.85<br>(0.45 - 1.25)              | 0.32<br>(-0.38 - 1.03)                                  |
| Maternal age 40+                         |                                                  |                                                         | 0.72<br>(-0.15 - 1.59)                                     |                                                                     | 1.06<br>(0.18 - 1.95)              | 0.19<br>(-1.08 - 1.45)                                  |
| Mother smoked<br>during pregnancy        |                                                  |                                                         | 1.33<br>(0.98 - 1.68)                                      |                                                                     | 1.21<br>(0.86 - 1.56)              | 0.28<br>(-0.28 - 0.84)                                  |
| Birth order: second<br>(reference first) |                                                  | -1.27<br>(-1.48 - -1.07)                                |                                                            |                                                                     | -1.33<br>(-1.54 - -1.13)           | -1.18<br>(-1.43 - -0.92)                                |
| Birth order: third                       |                                                  | -1.33<br>(-1.60 - -1.05)                                |                                                            |                                                                     | -1.45<br>(-1.73 - -1.17)           | -0.89<br>(-1.38 - -0.41)                                |
| Birth order: fourth<br>and higher        |                                                  | -1.13<br>(-1.52 - -0.74)                                |                                                            |                                                                     | -1.35<br>(-1.76 - -0.94)           | -0.3<br>(-1.07 - 0.46)                                  |

|                                                        |                       |                          |                       |                         |                         |                         |
|--------------------------------------------------------|-----------------------|--------------------------|-----------------------|-------------------------|-------------------------|-------------------------|
| Birth year 1987-1990<br>(reference 1995-2000)          |                       | -0.27<br>(-0.51 - -0.03) |                       |                         | -0.24<br>(-0.47 - 0.00) | 0.05<br>(-0.53 - 0.62)  |
| Birth year 1991-1994                                   |                       | -0.18<br>(-0.38 - 0.03)  |                       |                         | -0.16<br>(-0.36 - 0.05) | -0.03<br>(-0.39 - 0.33) |
| Household level of education: low<br>(reference: high) |                       |                          |                       | 0.74<br>(0.22 - 1.26)   | 0.53<br>(-0.01 - 1.07)  |                         |
| Household level of education: medium                   |                       |                          |                       | 0.23<br>(-0.07 - 0.54)  | 0.19<br>(-0.11 - 0.50)  |                         |
| Household level of education: medium-high              |                       |                          |                       | -0.09<br>(-0.38 - 0.19) | -0.1<br>(-0.39 - 0.18)  |                         |
| Household income decile                                |                       |                          |                       | -0.02<br>(-0.06 - 0.02) | -0.03<br>(-0.07 - 0.01) | 0.02<br>(-0.05 - 0.09)  |
| Constant                                               | 1.78<br>(1.61 - 1.95) | 2.81<br>(2.54 - 3.08)    | 1.52<br>(1.31 - 1.72) | 1.82<br>(1.41 - 2.23)   | 2.66<br>(2.20 - 3.12)   | 2.47<br>(1.84 - 3.09)   |
| Observations                                           | 106,652               | 106,652                  | 106,652               | 106,652                 | 106,652                 | 106,652                 |
| Number of siblings                                     |                       |                          |                       |                         |                         | 45,537                  |

**Appendix Table 2: Change in probability of preterm (95% confidence intervals)**

|                                          | <b>Model 1:<br/>unadjusted<br/>(child's sex)</b> | <b>Model 2: Model 1<br/>+ child<br/>characteristics</b> | <b>Model 3: Model 1<br/>+ maternal<br/>characteristics</b> | <b>Model 4: Model 1<br/>+ hh<br/>sociodemographic<br/>variables</b> | <b>Model 5: fully<br/>adjusted</b> | <b>Model 6: Model 5<br/>+ sibling fixed<br/>effects</b> |
|------------------------------------------|--------------------------------------------------|---------------------------------------------------------|------------------------------------------------------------|---------------------------------------------------------------------|------------------------------------|---------------------------------------------------------|
| Girl                                     | -0.68<br>(-0.90 - -0.46)                         | -0.68<br>(-0.90 - -0.46)                                | -0.68<br>(-0.91 - -0.46)                                   | -0.68<br>(-0.91 - -0.46)                                            | -0.69<br>(-0.91 - -0.46)           | -0.59<br>(-0.86 - -0.32)                                |
| Maternal age 10-19<br>(reference: 25-29) |                                                  |                                                         | 0.51<br>(-0.47 - 1.49)                                     |                                                                     | -0.17<br>(-1.18 - 0.84)            | 0.74<br>(-0.56 - 2.05)                                  |
| Maternal age 20-24                       |                                                  |                                                         | 0.52<br>(0.14 - 0.90)                                      |                                                                     | 0.27<br>(-0.12 - 0.66)             | 0.51<br>(-0.04 - 1.07)                                  |
| Maternal age 30-34                       |                                                  |                                                         | -0.05<br>(-0.35 - 0.25)                                    |                                                                     | 0.19<br>(-0.12 - 0.50)             | -0.24<br>(-0.73 - 0.26)                                 |
| Maternal age 35-39                       |                                                  |                                                         | 0.48<br>(-0.02 - 0.98)                                     |                                                                     | 0.83<br>(0.32 - 1.34)              | 0.4<br>(-0.50 - 1.30)                                   |
| Maternal age 40+                         |                                                  |                                                         | 1.37<br>(0.26 - 2.49)                                      |                                                                     | 1.79<br>(0.67 - 2.92)              | 0.36<br>(-1.25 - 1.96)                                  |
| Mother smoked<br>during pregnancy        |                                                  |                                                         | 0.76<br>(0.36 - 1.17)                                      |                                                                     | 0.66<br>(0.25 - 1.07)              | 0.5<br>(-0.20 - 1.21)                                   |
| Birth order: second<br>(reference first) |                                                  | -1.36<br>(-1.62 - -1.10)                                |                                                            |                                                                     | -1.41<br>(-1.67 - -1.15)           | -1.22<br>(-1.55 - -0.90)                                |
| Birth order: third                       |                                                  | -1.77<br>(-2.12 - -1.42)                                |                                                            |                                                                     | -1.87<br>(-2.23 - -1.51)           | -1.25<br>(-1.86 - -0.64)                                |
| Birth order: fourth<br>and higher        |                                                  | -1.23<br>(-1.75 - -0.71)                                |                                                            |                                                                     | -1.5<br>(-2.04 - -0.96)            | -0.31<br>(-1.28 - 0.66)                                 |

|                                                        |                       |                          |                         |                       |                         |                        |
|--------------------------------------------------------|-----------------------|--------------------------|-------------------------|-----------------------|-------------------------|------------------------|
| Birth year 1987-1990<br>(reference 1995-2000)          |                       | -0.24<br>(-0.55 - 0.07)  |                         |                       | -0.21<br>(-0.53 - 0.10) | 0.11<br>(-0.62 - 0.84) |
| Birth year 1991-1994                                   |                       | -0.27<br>(-0.53 - -0.01) |                         |                       | -0.24<br>(-0.51 - 0.02) | 0.06<br>(-0.39 - 0.52) |
| Household level of education: low<br>(reference: high) |                       |                          | 0.52<br>(-0.13 - 1.18)  |                       | 0.48<br>(-0.20 - 1.16)  |                        |
| Household level of education: medium                   |                       |                          | 0.33<br>(-0.07 - 0.73)  |                       | 0.35<br>(-0.05 - 0.75)  |                        |
| Household level of education: medium-high              |                       |                          | 0.14<br>(-0.24 - 0.51)  |                       | 0.14<br>(-0.24 - 0.52)  |                        |
| Household income decile                                |                       |                          | -0.03<br>(-0.08 - 0.02) |                       | -0.04<br>(-0.09 - 0.01) | 0<br>(0.00 - 0.17)     |
| Constant                                               | 3.62<br>(3.39 - 3.84) | 4.8<br>(4.45 - 5.15)     | 3.5<br>(3.22 - 3.78)    | 3.59<br>(3.05 - 4.13) | 4.67<br>(4.05 - 5.30)   | 3.83<br>(3.04 - 4.62)  |
| Observations                                           | 106,652               | 106,652                  | 106,652                 | 106,652               | 106,652                 | 106,652                |
| Number of siblings                                     |                       |                          |                         |                       |                         | 45,537                 |

**Appendix Table 3: Change in probability of LBW and preterm on the full sample, with 95% CI (Linear models)**

|                        | Low birth weight                      |                |                            |                | Preterm                               |               |                            |                |
|------------------------|---------------------------------------|----------------|----------------------------|----------------|---------------------------------------|---------------|----------------------------|----------------|
|                        | Model 1:<br>unadjusted (child<br>sex) |                | Model 5: fully<br>adjusted |                | Model 1:<br>unadjusted (child<br>sex) |               | Model 5: fully<br>adjusted |                |
|                        | B                                     | 95% CI         | $\beta$                    | 95% CI         | B                                     | 95% CI        | $\beta$                    | 95% CI         |
| Paternal age $\leq 24$ | 0.78                                  | (0.48 - 1.08)  | 0.03                       | (-0.35 - 0.40) | 0.86                                  | (0.50 - 1.23) | -0.07                      | (-0.52 - 0.39) |
| Paternal age 25-29     | 0.11                                  | (-0.08 - 0.30) | 0.00                       | (-0.21 - 0.21) | 0.24                                  | (0.00 - 0.48) | 0.02                       | (-0.25 - 0.29) |
| Paternal age 30-34     |                                       | 0.000          |                            | 0.000          |                                       | 0.000         |                            | 0.000          |
| Paternal age 35-39     | 0.44                                  | (0.21 - 0.67)  | 0.15                       | (-0.10 - 0.40) | 0.57                                  | (0.28 - 0.86) | 0.25                       | (-0.06 - 0.55) |
| Paternal age $\geq 40$ | 1.52                                  | (1.17 - 1.87)  | 0.7                        | (0.31 - 1.10)  | 1.73                                  | (1.31 - 2.15) | 0.75                       | (0.28 - 1.22)  |
| Constant               | 2.21                                  | (2.06 - 2.36)  | 3.03                       | (2.63 - 3.44)  | 4.06                                  | (3.86 - 4.26) | 4.83                       | (4.31 - 5.34)  |
| Number of observations |                                       | 159,225        |                            | 159,225        |                                       | 159,225       |                            | 159,225        |

Model 5 adjusted for child birth order, child birth year, maternal age at birth, maternal smoking during pregnancy, household income and household education. Standard errors are clustered at the family level.
